# Supplementary material for: Cyanidin-3-O-β-glucoside protects against pulmonary artery hypertension induced by monocrotaline via the TGF-β1/p38 MAPK/CREB signaling pathway
Source: PubMed Central journal article supplement — Mol Med Rep. 2021 Mar 9;23(5):338. doi: 10.3892/mmr.2021.11977 (PMC7974420; doi:10.3892/mmr.2021.11977), 2021-03-09
Supplement: Supplementary_Data.pdf [file Supplementary_Data.pdf]

Table SI. Primer sequences used for reverse transcription-quantitative PCR.

| Genes          | Primer sequence (5'→3')                               |
|----------------|-------------------------------------------------------|
| IL-6           | F: AGCGATGATGCACTGTCAGAA<br>R: AACGGAACTCCAGAAGACCAG  |
| TNF- $\alpha$  | F: GATCGGTCCCAACAAGGAGG<br>R: TTTGCTACGACGTGGGCTAC    |
| IL-10          | F: ATGGCCCAGAAATCAAGGAGC<br>R: ATTCATGGCCTTGTAGACACC  |
| $\alpha$ -SMA  | F: CGTCGGAAGAGGAAGGAACAA<br>R: CAGACCCACCGGCTGATTTT   |
| SM22           | F: AGTTCACTTACCCGGAGCTAAT<br>R: CTTTGGCCAAGGTTTCATTGC |
| vWF            | F: GACTTTGAAGCCCCTGGACA<br>R: GCCACCTCTCACTCCTAAGC    |
| ICAM-1         | F: GCCTGGGGTTGGAGACTAAC<br>R: CTGTCTTCCCAATGTCGCT     |
| VCAM-1         | F: GCTGCGAGTCACCATTGTTC<br>R: ACTTCGTTCCAGCTTCCCAG    |
| $\beta$ -actin | F: CGTAAAGACCTCTATGCCAACA<br>R: CGGACTCATCGTACTCCTGCT |

F, forward; R, reverse; IL-, interleukin; TNF- $\alpha$ , tumor necrosis factor- $\alpha$ ;  $\alpha$ -SMA,  $\alpha$ -Smooth muscle actin; SM22, smooth muscle 22; vWF, von Willebrand factor; ICAM-1, intercellular adhesion molecule-1; VCAM-1, vascular adhesion molecule-1.
